# Supplementary material for: Impact of debt, reserves, and political stability on Sri Lanka’s financial crisis
Source: PubMed Central journal article supplement (PMC10656016; doi:10.1371/journal.pone.0294455), 2023-11-17
Supplement: pone.0294455.s002.pdf [file pone.0294455.s002.pdf]

## S2 Supporting Information

I am very grateful that you pointed out these lapses. Please disregard my previous mail. I provide the missing information below. Also, in an Excel worksheet attached.

### 1.) The values behind the means, standard deviations and other measures reported.

The data set is provided in the file "S1 Dataset"

### 2.) The values used to build graphs.

Graph 1 (Fig 1: \$Debt and \$Reserves of Sri Lanka from 1997 to 2022 compared to the exchange rate)

| Year | \$Reserves | \$Debt   | Exchange Rate |
|------|------------|----------|---------------|
| 1996 | 1,937.     | 8,486.0  | 0.0176        |
| 1997 | 2,029.0    | 8,197.0  | 0.0163        |
| 1998 | 1,984.0    | 8,749.0  | 0.0148        |
| 1999 | 1,639.0    | 9,088.0  | 0.0139        |
| 2000 | 1,049.0    | 9,031.0  | 0.0125        |
| 2001 | 1,338.0    | 8,372.0  | 0.0107        |
| 2002 | 1,700.0    | 9,333.0  | 0.0103        |
| 2003 | 2,329.0    | 10,735.0 | 0.0103        |
| 2004 | 2,195.8    | 11,346.0 | 0.0096        |
| 2005 | 2,735.0    | 11,353.8 | 0.0098        |
| 2006 | 2,836.7    | 11,981.4 | 0.0093        |
| 2007 | 3,508.2    | 13,989.5 | 0.0092        |
| 2008 | 2,560.9    | 15,106.6 | 0.0088        |
| 2009 | 5,357.4    | 18,662.1 | 0.0087        |
| 2010 | 7,196.5    | 21,437.9 | 0.0090        |
| 2011 | 6,749.3    | 32,747.9 | 0.0088        |
| 2012 | 7,105.8    | 37,098.1 | 0.0079        |
| 2013 | 7,495.0    | 39,905.3 | 0.0076        |
| 2014 | 8,208.4    | 42,914.1 | 0.0076        |
| 2015 | 7,303.6    | 44,839.4 | 0.0069        |
| 2016 | 6,019.0    | 46,418.0 | 0.0067        |
| 2017 | 7,958.7    | 51,603.9 | 0.0065        |
| 2018 | 6,919.2    | 52,411.8 | 0.0055        |
| 2019 | 7,642.4    | 54,811.5 | 0.0055        |
| 2020 | 5,664.3    | 49,041.3 | 0.0054        |
| 2021 | 3,139.2    | 51,775.1 | 0.0050        |
| 2022 | 1,897.6    | 49,678.1 | 0.0028        |

Graph 3 and 4 (Fig 2. CRISIS index fairly represent the situation in Sri Lanka)

| YEAR | EX Volatility | 12 TBILL | INFLATION | GDP GWT  | CRISIS   |
|------|---------------|----------|-----------|----------|----------|
| 1996 | 0.0712        | 10.01    | 9.45      | 5.1      | 14.4312  |
| 1997 | 0.0746        | 10.21    | 9.573696  | 6.4054   | 13.4529  |
| 1998 | 0.079043      | 12.59    | 9.364243  | 4.698423 | 17.33486 |
| 1999 | 0.105622      | 12.77    | 4.691706  | 4.30054  | 13.26679 |

|      |          |       |          |          |          |
|------|----------|-------|----------|----------|----------|
| 2000 | 0.062841 | 18.22 | 6.176276 | 6.000033 | 18.45908 |
| 2001 | 0.223513 | 13.74 | 14.15846 | -1.54541 | 29.66738 |
| 2002 | 0.044134 | 9.91  | 9.551032 | 3.964676 | 15.54049 |
| 2003 | 0.035848 | 7.24  | 6.314638 | 5.940269 | 7.650217 |
| 2004 | 0.004959 | 7.65  | 7.575926 | 5.445061 | 9.785823 |
| 2005 | 0.018195 | 10.37 | 11.63969 | 6.241748 | 15.78613 |
| 2006 | 0.030994 | 12.96 | 10.02018 | 7.668292 | 15.34289 |
| 2007 | 0.063259 | 19.96 | 15.84211 | 6.796826 | 29.06854 |
| 2008 | -0.00682 | 12.12 | 22.5645  | 5.950088 | 28.72759 |
| 2009 | 0.05638  | 9.33  | 3.464963 | 3.538912 | 9.312431 |
| 2010 | 0.006408 | 7.55  | 6.217649 | 8.015967 | 5.75809  |
| 2011 | -0.03314 | 9.31  | 6.716768 | 8.404733 | 7.588891 |
| 2012 | 0.027064 | 11.69 | 7.542914 | 9.144572 | 10.11541 |
| 2013 | 0.108476 | 8.29  | 6.90845  | 3.395733 | 11.91119 |
| 2014 | 0.035658 | 6.01  | 3.179002 | 4.960701 | 4.263959 |
| 2015 | 0.011094 | 7.3   | 3.768368 | 5.007683 | 6.071779 |
| 2016 | 0.088233 | 10.17 | 3.958888 | 4.486635 | 9.730487 |
| 2017 | 0.042695 | 8.9   | 7.704138 | 3.57817  | 13.06866 |
| 2018 | 0.026342 | 11.2  | 2.135038 | 3.272    | 10.08938 |
| 2019 | 0.15757  | 8.45  | 3.528394 | 2.32882  | 9.807144 |
| 2020 | 0.017962 | 5.05  | 6.153945 | -3.61519 | 14.8371  |
| 2021 | 0.050455 | 8.24  | 7.014781 | 3.655632 | 11.6496  |
| 2022 | 0.524934 | 29.27 | 46.4     | -7.8     | 83.99493 |

Graphs 3, 4 and 5 (Fig 5. Scatter-plots)

These charts are generated by SPSS software

Fig 6. Change of estimates of WGI over 20 years

| Year | Political Stability and Absence of Violence96 | Government Effectiveness96 | Rule of Law96 | Voice and Accountability96 | Regulatory Quality96 | Control of Corruption96 |
|------|-----------------------------------------------|----------------------------|---------------|----------------------------|----------------------|-------------------------|
| 1996 | -1.7783                                       | -0.18363                   | 0.16126       | -0.26914                   | 0.06473              | -0.05654                |
| 2001 | -1.90411                                      | -0.34237                   | 0.15953       | -0.19072                   | 0.158748             | -0.19923                |
| 2006 | -1.42155                                      | -0.1598                    | 0.177753      | -0.31016                   | -0.27253             | -0.1948                 |
| 2011 | -0.72477                                      | -0.10306                   | -0.11706      | -0.54505                   | -0.13135             | -0.39936                |
| 2016 | -0.00403                                      | 0.00942                    | 0.125161      | -0.08105                   | -0.10255             | -0.30207                |
| 2021 | -0.31793                                      | -0.08303                   | 0.038458      | -0.06961                   | -0.36996             | -0.33456                |

### **3.) The points extracted from images for analysis.**

Fig 1. Fig 1: \$Debt and \$Reserves of Sri Lanka from 1997 to 2022 compared to the exchange rate.

This graph shows the comparative trends of external debt (\$Debt) and foreign reserves (\$Reserves) with exchange rate fluctuations (US\$: LKR). It is referred to in the line 125 of the text in page 9.

Fig 2. CRISIS index fairly represent the situation in Sri Lanka

The point taken from this image is the appropriateness of the composite variable CRISIS to the current situation in Sri Lanka. This is referred in the line 277 of the text in page 15.

Fig 3. Theoretical framework

The wholistic approach is given in this image and referred to in line 299 of the text in page 16.

Fig 4. Independent variables Vs Regression residuals

The points extracted from these images are discussed in the line #428 in page 24, that is additional evidence to support absence of endogeneity.

Fig 5. Regression results

The regression results are discussed in lines from 431 to 439 in page 25.

Fig 6. Change of estimates of WGI over 20 years.

The points extracted from this image are discussed in lines 461, 462 and 463 in page 26.

Fig 7. The vicious cycle

The points extracted from this image are discussed in lines from 467 to 470 in page 26.
